1 **Two-photon calcium imaging of medial prefrontal cortex and hippocampus**  
2 **without cortical invasion**

3  
4 Masashi Kondo<sup>1,2</sup>, Kenta Kobayashi<sup>3</sup>, Masamichi Ohkura<sup>4</sup>, Junichi Nakai<sup>4</sup>, and Masanori  
5 Matsuzaki<sup>1,2</sup>  
6

7 <sup>1</sup>Department of Physiology, Graduate School of Medicine, The University of Tokyo, Tokyo,  
8 Japan

9 <sup>2</sup>Division of Brain Circuits, National Institute for Basic Biology, Okazaki, Japan

10 <sup>3</sup>Section of Viral Vector Development, National Institute for Physiological Sciences, Okazaki,  
11 Japan

12 <sup>4</sup>Brain Science Institute, Saitama University, Saitama, Japan  
13

14  
15 Corresponding author: Professor Masanori Matsuzaki, Ph.D.

16 Address: Department of Physiology, Graduate School of Medicine, The University of Tokyo,

17 7-3-1, Hongo, Bunkyo-ku, Tokyo, 113-0033, Japan

18 Tel: +81-3-5841-3471

19 Fax: +81-3-5841-3471

20 E-mail: [mzakim@m.u-tokyo.ac.jp](mailto:mzakim@m.u-tokyo.ac.jp)  
21  
22  
23

24 **Abstract**

25 ***In vivo* two-photon calcium imaging currently allows us to observe the activity of**  
26 **multiple neurons up to ~900  $\mu\text{m}$  below the cortical surface without cortical invasion.**  
27 **However, many other important brain areas are located deeper than this. Here, we used**  
28 **a 1100 nm laser, which underfilled the back aperture of the objective, and red**  
29 **genetically encoded calcium indicators to establish two-photon calcium imaging of the**  
30 **intact mouse brain and detect neural activity up to 1200  $\mu\text{m}$  from the cortical surface.**  
31 **This imaging was obtained from the medial prefrontal cortex (the prelimbic area) and**  
32 **the hippocampal CA1 region. We found that the neural activity related to reward**  
33 **prediction is higher in the prelimbic area than in layer 2/3 of the secondary motor area,**  
34 **while it is negligible in the hippocampal CA1 region. Reducing the invasiveness of**  
35 **imaging is an important strategy to reveal the brain processes active in cognition and**  
36 **memory.**  
37

## 38 **Introduction**

39 Two-photon calcium imaging reveals the *in vivo* activity of multiple neurons at a cellular and  
40 subcellular resolution (Jia et al., 2010; Ohki et al., 2005). Recent work demonstrated that, by  
41 exciting red-fluorescent calcium indicators with a laser at wavelengths of 1000–1100 nm, it is  
42 possible to image neural activity in the mouse sensory cortex at depths of 800–900  $\mu\text{m}$  from  
43 the cortical surface attached to a cranial window (corresponding to layers 5 and 6) (Dana et  
44 al., 2016; Tischbirek et al., 2015). However, for functional imaging of deeper regions, such as  
45 the medial prefrontal cortex, hippocampus, and basal ganglia, it has been reported that  
46 invasive penetration is unavoidable; it is necessary to insert a microlens or a microprism into  
47 the cortical tissue, or remove the cortical tissue above the target region (Attardo et al., 2015;  
48 Dombeck et al., 2010; Low et al., 2014; Pilz et al., 2016). In this study, we demonstrate that,  
49 by shortening the light-path length within the tissue to reduce light scattering (Helmchen and  
50 Denk, 2005) and exciting red-fluorescent genetically encoded calcium indicators (red GECIs;  
51 Dana et al., 2016; Ohkura et al., 2015), we could detect the activity of multiple neurons in the  
52 medial prefrontal cortex (the prelimbic [PL] area) and hippocampal CA1 region at depths of  
53 1.0–1.2 mm in behaving mice, without the need for invasive penetration or removal of  
54 cortical tissue.

55

## 56 **Results and Discussion**

57 The light-path length within the tissue was shortened by reducing large-angle rays emitting  
58 from an objective with high numerical aperture (1.05 or 1.00). To do so, the back aperture of  
59 the objective was underfilled with a diameter-narrowed laser beam (7.2 mm, in comparison  
60 with that of the back aperture of 15.1 mm or 14.4 mm) (Helmchen and Denk, 2005;  
61 Matsuzaki et al., 2008) at a wavelength of 1100 nm. Three to four weeks after an injection of  
62 adeno-associated virus (AAV) carrying the R-CaMP1.07 gene into the intact medial frontal  
63 cortex (mFrC) of 2–3-month-old mice, we observed R-CaMP1.07-expressing neurons in the  
64 mFrC at depths of 100–1200  $\mu\text{m}$  from the cortical surface, in awake and head-restrained mice  
65 (Figure 1a, b and Video 1). Using a laser intensity of 170–180 mW under the objective, we  
66 could detect calcium transients at depths of 1.0–1.2 mm (Figure 1c). Cell death, severe  
67 inflammation, and heating-induced responses were not apparent on histological staining after  
68 long-term imaging of the mFrC (Figure 1d–g). This is consistent with a study that reported  
69 that heat-induced cell responses occur when the laser intensity exceeds 300 mW (Podgorski  
70 and Ranganathan, 2016).

71 We next examined whether neural activity in the hippocampus can be imaged

72 without removal of the neocortical tissue lying above it (Figure 2a). CA1 GFP-expressing  
73 neurons can be detected by two-photon microscopy in 4-week-old mice, but not in 6- to  
74 9-week-old mice (Kawakami et al., 2013). We therefore injected AAV-jRGECO1a into the  
75 hippocampus of mice aged between 12 and 14 days, and then performed imaging after  
76 another 2 weeks. When we deepened the focal plane below the white matter to depths of  
77 900–1000  $\mu\text{m}$ , we observed densely distributed fluorescent neurons typically located in CA1  
78 pyramidal layer (Figure 2b, c and Video 2), as described previously (Dombeck et al., 2010),  
79 and clearly detected spontaneous calcium transients from these neurons (Figure 2c). No cell  
80 death or strong damage was apparent after 15 min of imaging (Figure 2d, e). By contrast, we  
81 could not detect any neural activity in the CA1 region of the mice when they were 3 months  
82 old. To image neural activity in the hippocampus or the infralimbic area of adult mice, it is  
83 necessary to use higher average power of the laser or higher peak power per pulse than that  
84 used in this study (Kawakami et al., 2015). In addition, adaptive optics (Ji et al., 2010) and  
85 further improvement of red GECIs (Dana et al., 2016; Inoue et al., 2014) will certainly be  
86 helpful.

87 To demonstrate the utility of this method for identifying neural functions in deep  
88 areas in the intact brain, we examined reward prediction-related activity in the mFrC over ~1

89 mm depth, as the mFrC demonstrates strong activity before movement starts (Friedman et al.,  
90 2015; Kim et al., 2016; Pinto and Dan, 2015; Sul et al., 2011). Head-restrained mice were  
91 conditioned to the delivery of a drop of water with an inter-delivery interval of 20 s (Figure  
92 3a). As each session progressed (one session per day), the lick response to the water delivery  
93 increased in rate and became faster (Figure 3a–d). From the fifth session onwards, we  
94 performed two-photon calcium imaging of the mFrC at cortical depths of 100–1200  $\mu\text{m}$   
95 (Video 3). The imaging fields were classified into three areas according to depth (Paxinos and  
96 Franklin, 2007): the superficial area (100–300  $\mu\text{m}$ , corresponding to layer 2/3 in the  
97 secondary motor area, M2), middle area (300–800  $\mu\text{m}$ , corresponding to layer 5 in M2), and  
98 deep area (800–1200  $\mu\text{m}$ , roughly corresponding to layer 6 in M2 and the PL area). In all  
99 three areas, approximately 50% of neurons showed a peak of mean (trial-averaged) activity  
100 during 5 s after the water delivery (Figure 3e, f), which was presumably related to licking and  
101 water acquisition (Figure 3b). Additionally, approximately 30% of neurons in all three areas  
102 showed a peak mean activity during 10 s before the water delivery (pre-reward period). The  
103 sequential distribution of the times of peak activity was not an artifact of ordering the neurons  
104 according to the time of peak activity, as the ratio of the mean activity around the peak  
105 activity to the baseline activity (ridge-to-background ratio; Harvey et al., 2012) was

106 significantly higher than that of shuffled data (Figure 3g, h). Additionally, the sequential  
107 distribution of neurons with peak activity during the pre-reward period was not an artifact  
108 (Figure 3–Figure supplement 1). Even when 5 s windows were chosen from the pre-reward  
109 period, the ridge-to-background ratios of deep-area neurons with peak activity during each 5  
110 s window were frequently higher than those in the shuffled data (Figure 3–Figure supplement  
111 2 and Table supplement 1). To determine whether the activity pattern across trials was stable  
112 for individual neurons with peak activity during the pre-reward period, we calculated the  
113 correlation coefficient between the times of peak activity of two randomly separated groups  
114 of trials (Figure 3–Figure supplement 3a, b; see details in Materials and Methods section) and  
115 found that it was higher in the deep area than in the superficial area (Figure 3–Figure  
116 supplement 3c). This suggests that the PL neurons reliably code the reward prediction (or  
117 prediction of timing of the water delivery). The deep imaging method should therefore help  
118 us to understand the hierarchical and/or parallel processing occurring across the M2 and PL  
119 areas during decision-making.

120 We also examined the activity pattern of hippocampal CA1 neurons in the young  
121 mice during the conditioning session (Video 4). The distribution of the time of peak activity  
122 was not random in all neurons, but was random in those neurons with a peak activity during

123 the pre-reward period (Figure 4a–d). The time of peak activity of the latter neurons was also  
124 unstable across trials (Figure 4e). This indicates that the hippocampal CA1 neurons do not  
125 code the reward prediction in this conditioning without environmental changes, although we  
126 could not exclude the possibility that reward prediction-related activity may mature in  
127 adulthood.

128           In the intact brain, it is easy to change the field of view horizontally to the cortical  
129 surface. An 8 mm-wide glass window can be used for long-term imaging of the whole dorsal  
130 neocortex in the mouse (Kim et al., 2016), which would make it possible to image the medial  
131 prefrontal cortex and the hippocampus in memory-guided decision-making. If an objective  
132 with a wide field of view ( $>3$  mm) is used (Sofroniew et al., 2016; Stirman et al., 2016; Tsai  
133 et al., 2015), the neural activity in both areas could be simultaneously imaged. Deep and  
134 wide-field two-photon calcium imaging of the intact brain will substantially help us  
135 understand the brain circuits that underlie cognition and memory processes.

136

137

### 138 **Competing interests**

139 The authors declare no competing financial interests.



140

141 **Author contributions**

142 M.K. and M.M. designed the experiments. M.K. performed two-photon imaging and mouse

143 experiments and analyzed the data. M.O. and J. N. created R-CaMP1.07. K.K. made

144 AAV1-hSyn-R-CaMP1.07. M.K. and M.M. wrote the paper, with comments from all the

145 authors.

146 **Acknowledgements**

147 We thank Y. Hirayama for technical assistance, J. Saito, Y.H. Tanaka, and H. Wake for

148 plasmid construction, and Y.R. Tanaka for helpful discussion and writing a Matlab function

149 to directly deal with images in the Olympus format. We thank V. Jayaraman, D.S. Kim, L.L.

150 Looger, and K. Svoboda from the GENIE Project, Janelia Research Campus, Howard Hughes

151 Medical Institute for providing AAV1-hSyn-jRGECO1a. This work was supported by

152 Grant-in-Aids for Scientific Research on Innovative Areas (15H01455 to M.M.) and for

153 Scientific Research (A) (15H02350 to M.M.) from the Ministry of Education, Culture, Sports,

154 Science, and Technology, Japan, the Strategic Research Program for Brain Sciences and the

155 program for Brain Mapping by Integrated Neurotechnologies for Disease Studies

156 (Brain/MINDS) from Japan Agency for Medical Research and Development to M.M., and a

157 Takeda Foundation grant to M.M.

158

159 **Materials and Methods**

160 **Animals**

161 All animal experiments were approved by the Institutional Animal Care and Use Committee  
162 of The University of Tokyo, Japan. All mice were provided with food and water *ad libitum*  
163 and housed in a 12:12 h light–dark cycle. The mice were not used for other experiments  
164 before this study. Male C57BL/6 mice (aged 2–3 months, SLC, Shizuoka, Japan) were  
165 utilized for mFrC imaging. Male and female C57BL/6 mice (aged 12–40 days in the young  
166 mice, and 2–3 months in the adult mice; Japan SLC, Shizuoka, Japan) were utilized for the  
167 imaging experiments on the hippocampus. For experiments using young mice, pups were  
168 weaned at P30, and then group-housed until the imaging window was implanted.

169

170 **Virus production**

171 In this study, two red-fluorescent genetically encoded calcium indicators, R-CaMP1.07  
172 (Ohkura et al., 2012) and jRGECO1a (Dana et al., 2016), were used. For imaging of  
173 R-CaMP1.07, the GCaMP3 DNA of pAAV-human synapsin I promoter  
174 (hSyn)-GCaMP3-WPRE-hGH polyA (Masamizu et al., 2014) was replaced with  
175 R-CaMP1.07 DNA from a pN1-R-CaMP1.07 vector construct (Ohkura et al., 2012).

176 rAAV2/1-hSyn-R-CaMP1.07 ( $1.3 \times 10^{13}$  vector genomes/ml) was produced with pAAV2-1  
177 and purified as described previously (Kaneda et al., 2011; Kobayashi et al., 2016).

178 rAAV2/1-hSyn-NES-jRGECO1a ( $2.95 \times 10^{13}$  vector genomes/ml) was obtained from the  
179 University of Pennsylvania Gene Therapy Program Vector Core.

180

## 181 **Surgical procedures**

182 *mFrC*

183 Mice were anesthetized by intramuscular injection of ketamine (74 mg/kg) and xylazine  
184 (10 mg/kg) before an incision was made in the skin covering the neocortex. After the mice  
185 were anesthetized, atropine (0.5 mg/kg) was injected to reduce bronchial secretion and  
186 improve breathing, and an eye ointment (Tarivid; 0.3% w/v ofloxacin, Santen Pharmaceutical,  
187 Osaka, Japan) was applied to prevent eye-drying. Body temperature was maintained at 36–  
188 37°C with a heating pad. After the exposed skull was cleaned, a head-plate (Tsukasa Giken,  
189 Shizuoka, Japan; Hira et al., 2013) was attached to the skull using dental cement (Fuji lute  
190 BC; GC, Tokyo, Japan, and Bistite II; Tokuyama Dental, Tokyo, Japan). The surface of the  
191 intact skull was coated with dental adhesive resin cement (Super bond; Sun Medical, Shiga,  
192 Japan) to prevent drying. An isotonic saline solution with 5 w/v% glucose was injected

193 intraperitoneally after the surgery. Mice were allowed to recover for 1 day before virus  
194 injection.

195           Thirty minutes before surgery for virus injection, dexamethasone sodium  
196 phosphate (1.32 mg/kg) was administered intraperitoneally to prevent cerebral edema. Mice  
197 were anesthetized with isoflurane (3–4% for induction and ~1% during surgery) inhalation  
198 and placed on a stereotaxic frame (SR-5M; Narishige, Tokyo, Japan). Before virus injection,  
199 a pulled glass pipette (broken and beveled to an outer diameter of 25–30  $\mu\text{m}$ ; Sutter  
200 Instruments, CA, USA) and a 5  $\mu\text{l}$  Hamilton syringe were back-filled with mineral oil  
201 (Nacalai Tesque, Kyoto, Japan) and front-loaded with virus solution. The virus solution was  
202 then injected into the mFrC (2.7–2.8 mm anterior and 0.4 mm left of the bregma, 800–1200  
203  $\mu\text{m}$  dorsal from the pial surface). To minimize background fluorescence from solution  
204 backflow through the space made by the glass capillary insertion, the axis of the glass  
205 capillary was angled 30–40° from the horizontal plane. From 100 to 200 nl of AAV solution  
206 was injected via a syringe pump at a rate of 15–20 nl/min (KDS310; KD Scientific, MA,  
207 USA). The capillary was maintained in place for more than 10 min after the injection before  
208 being slowly withdrawn. The craniotomy was then covered with silicon elastomer (quick cast,  
209 World Precision Instruments, FL, USA) and dental adhesive (Super bond). At least 3 weeks

210 after the viral injection, the craniotomy (1.5 mm diameter at the area of interest) was  
211 conducted and dura mater was removed. A glass window was placed over the craniotomy,  
212 and the edge was sealed with cyanoacrylate adhesive (Vetbond, 3M, MN, USA), dental resin  
213 cement, and dental adhesive. The glass window consisted of two circular cover slips (No.1,  
214 0.12–0.17 mm thickness and 2.5 mm diameter; and No.5, 0.45–0.60 mm thickness and 1.5  
215 mm diameter; Matsunami Glass, Osaka, Japan) that were glued together with UV-curing  
216 optical adhesive (NOR-61; Norland Products, NJ, USA). After the window implantation, a  
217 250 µl saline solution containing anti-inflammatory and analgesic carprofen (6 mg/kg) was  
218 administered intraperitoneally. Mice were then returned to their cages, and imaging sessions  
219 were started after allowing at least 1 day for recovery.

## 220 *Hippocampus*

221 The procedures for the hippocampus were mostly the same as those for the mFrC. However,  
222 when the viral solution was injected at P12–14, the head-plate was not attached, as at their  
223 age the body size was too small to allow attachment. Two weeks after injection, the mice  
224 were anesthetized by intraperitoneal injection of ketamine (74 mg/kg) and xylazine  
225 (10 mg/kg), the head-plate was attached, and the imaging window was implanted. The glass  
226 window consisted of two circular cover slips (No.1, 0.12–0.17 mm thickness and 2.5 mm

227 diameter; and No.3, 0.25–0.35 mm thickness and 1.5 mm diameter). The dura mater was not  
228 removed, as it was thinner and more fragile than that in the adult mice.

229

### 230 **Behavioral conditioning**

231 The mice were water-deprived in their home cages and maintained at 80–85% of their normal  
232 weight throughout the experiments. During the behavioral conditioning, mice were set within  
233 a body chamber and head-fixed with custom-designed apparatus (O'Hara, Tokyo, Japan; Hira  
234 et al., 2013). A spout was set in front of their mouth, and a 4  $\mu$ l drop of water was delivered  
235 from the spout at a time interval of 20 s. The mice were allowed to lick at any time, and  
236 licking behavior was monitored by an infrared LED sensor. The rate of water delivery that  
237 incurred at least one lick during 2 s after the delivery was defined as the responsive rate. The  
238 duration of the daily conditioning sessions was 40–60 min. At the end of each session, the  
239 mice were allowed to freely gain water drops (total water consumption was  $\sim$ 1 ml per  
240 session). On rest days (typically weekends), the mice had free access to a 3% agarose block  
241 (1.2 g per day) in the cage.

242

### 243 **Two-photon calcium imaging**

244 Two-photon imaging was conducted using an FVMPE-RS system (Olympus, Tokyo, Japan)  
245 equipped with a 25× water immersion objective (for imaging of the mFrC:  
246 XLPLN25XSVMP, numerical aperture: 1.0, working distance: 4 mm, Olympus; for imaging  
247 of the hippocampus: XLPLN23XWMP2, numerical aperture: 1.05, working distance: 2 mm,  
248 Olympus) and a broadly tunable laser with a pulse width of 120 fs and a repetition rate of 80  
249 MHz (Insight DS+ Dual, Spectra Physics, CA, USA), set at a wavelength of 1100 nm.  
250 Fluorescence emissions were collected using a GaAsP photomultiplier tube (Hamamatsu  
251 Photonics, Shizuoka, Japan). To shorten the light-path length within the tissue, the back  
252 aperture of the objective was underfilled with the diameter-shortened (7.2 mm, in comparison  
253 with that of the back aperture of 15.1 mm or 14.4 mm) laser beam<sup>11</sup>. When the modified laser  
254 at a wavelength of 1100 nm was used for two-photon excitation of 0.1 μm fluorescent beads,  
255 the full-widths at half-maximum were  $0.94 \pm 0.09$  μm (mean  $\pm$  s.d.,  $n = 5$  beads) laterally and  
256  $7.7 \pm 1.70$  μm ( $n = 5$  beads) axially, which are comparable to those used for two-photon  
257 calcium imaging of multiple neurons with cellular resolution (Lecoq et al., 2014; Sadakane et  
258 al., 2015).

259           During the imaging session, the mouse head was fixed and the body was  
260 constrained within a body chamber under the microscope (OPR-GST, O'Hara; Masamizu et



261 al., 2014). Before the first imaging session of each mouse started, the angle of the stage on  
262 which the mouse chamber was placed was finely adjusted to set the glass window  
263 perpendicular to the optical axis. This was accomplished by the imaging of microbeads on the  
264 surface of the glass window (Kawakami et al., 2015). The frame acquisition rate was 30  
265 frames/s, and the size of the imaging fields was generally  $512 \times 512$  pixels (0.904  $\mu\text{m}/\text{pixel}$ ),  
266 or  $512 \times 160$  pixels, with three-frame averaging to increase the signal-to-noise ratio. The  
267 depth of the functional imaging plane was up to 1200  $\mu\text{m}$  from the cortical surface ( $n = 62$   
268 planes in the mFrC from 11 mice expressing R-CaMP1.07,  $n = 6$  in the hippocampus from  
269 three mice expressing jRGECO1a). The duration of one imaging session was 15–20 min, and  
270 1–4 imaging sessions from different depths were performed in a daily experiment. For each  
271 mouse, imaging was conducted for 3–5 days.

272

### 273 **Image processing**

274 Analyses were performed using MATLAB (R2016a, version 9.0.0.341360; MathWorks, MA,  
275 USA) and Fiji software (Schindelin et al., 2012). Raw image sequences acquired on the  
276 FVMPE-RS system were loaded into MATLAB using custom-written scripts. Motion  
277 correction was performed by phase-correlation using the Suite2P package (Pachitariu et al.,

278 2016). After the motion correction, images were three frame-averaged before being analyzed.

279 A constrained non-negative matrix factorization (cNMF) algorithm was employed to extract

280 neural activities from a time series of images (Pnevmatikakis et al., 2016). The noise

281 variances in the power spectrum density at high frequency estimated by the cNMF algorithm

282 were as follows (mean  $\pm$  s.d.):  $14.42 \pm 5.11$  ( $n = 12$  fields) in the superficial area of the mFrC,

283  $22.00 \pm 10.27$  ( $n = 35$  fields) in the middle area of the mFrC,  $21.69 \pm 12.63$  ( $n = 15$  fields) in

284 the deep area of the mFrC, and  $19.45 \pm 3.68$  ( $n = 6$  fields) in the hippocampal CA1 region.

285 The detrended relative fluorescence changes ( $\Delta F/F$ ) were calculated with eight percentile

286 values over an interval of  $\pm 30$  s around each sample time point (Dombeck et al., 2007).

287 Traces of  $\Delta F/F$  from 10 s before to 10 s after the water delivery in those deliveries with at

288 least one lick during 2 s after the delivery were used for the analyses.

289

## 290 **Data analysis**

291 The ridge-to-background ratio was used for the estimation of the distribution of the time of

292 peak activity (Harvey et al., 2012). To create a shuffled  $\Delta F/F$  trace of each neuron, the time

293 point of the actual  $\Delta F/F$  trace was circularly shifted by a random amount for each trial and

294 then trial-averaged. For each neuron, the ridge  $\Delta F/F$  was defined as the mean  $\Delta F/F$  over 12

295 frames (100 ms/frame) surrounding the time of peak activity, and the background  $\Delta F/F$  was  
296 defined as the mean  $\Delta F/F$  in the other data points. The ridge  $\Delta F/F$  was then divided by the  
297 background  $\Delta F/F$ .

298           The trial-by-trial stability of the time of peak activity of the neurons that had their  
299 peak activity during the pre-reward period (-10 s to 0 s) was evaluated as follows: in each  
300 session, all trials were randomly divided into two groups, and the trial-averaged activity in  
301 each group was calculated for each neuron. To remove the effects of different sample sizes  
302 across the three mFrC areas and the hippocampus, 50 neurons were randomly chosen from all  
303 imaging fields in each area. The time of peak activity in one group was plotted against that in  
304 the other, and the Pearson's correlation coefficient was determined. Thus, if the timing of the  
305 peak activity of each neuron was constant across trials, the correlation coefficient should be 1.  
306 This procedure was repeated 1000 times, and the 95% confidence interval was determined for  
307 each of the areas. When the lower bound of the 95% confidence interval was above zero, it  
308 was concluded that the time of peak activity was not random across trials. To estimate the  
309 difference in the trial-by-trial stability of the time of peak activity between pairs of the three  
310 areas in the mFrC (Figure 3–Figure supplement 3c), the mean correlation coefficients were  
311 compared using a permutation test. For each pair from the superficial, middle, and deep areas,

312 all neurons with peak activity during the pre-reward period were randomly reassigned to one  
313 of the two areas. For each area with reassigned neurons, the correlation coefficient between  
314 the times of peak activity of the two randomly separated groups of trials was calculated, and  
315 the absolute difference of the correlation coefficients between the two areas was estimated.  
316 This procedure was repeated 10000 times, and the distribution of the absolute differences  
317 between the two areas was determined. Following this, the statistical significance was  
318 determined according to whether or not the absolute difference in the mean correlation  
319 coefficients between the two areas with original neurons assigned (Figure 3–Figure  
320 supplement 3b) was above the 95th percentile of the resampled distribution corrected using  
321 the Bonferroni method.

322

### 323 **Histology**

324 After the last *in vivo* imaging session, the mice were deeply anesthetized with ketamine (74  
325 mg/kg) and xylazine (10 mg/kg) and transcardially perfused with 40 ml of phosphate  
326 buffered saline (PBS) and 40 ml of 4% paraformaldehyde in PBS (Wako, Osaka, Japan). The  
327 brains were removed and postfixed with the same fixative at 4°C for longer than 12 h. For  
328 immunostaining, the brains were cut into coronal sections with a thickness of 50–100  $\mu\text{m}$ .

329 Slices were washed in PBS-X (0.5% triton-X in PBS) containing 10% normal goat serum,  
330 and then incubated with one of the primary antibodies (1:500 dilution of rabbit anti-GFAP  
331 [glial fibrillary acidic protein], G9269, Sigma-Aldrich, MO, USA; 1:500 dilution of rabbit  
332 anti-Iba1, 019-19741, Wako; 1:400 dilution of mouse anti-HSP70/72 [heat shock protein  
333 70/72], ADI-SPA-810-F, Enzo Life Sciences, NY, USA) overnight at 4°C. Afterwards, slices  
334 were washed in PBS-X and incubated with species-appropriate Alexa Fluoro-488 conjugated  
335 secondary antibody (1:500 dilution of anti-rabbit IgG for GFAP and Iba1 antibodies; 1:500  
336 dilution of anti-mouse IgG for HSP70/72 antibody). After staining the cell nuclei with  
337 fluorescent Nissl stain (NeuroTrace 435/455, 1:200, N21479, Thermo Fisher Scientific, MA,  
338 USA), the slices were mounted on glass slides with Fluoromount/Plus mounting medium  
339 (Diagnostic BioSystems, CA, USA). Fluorescence images were acquired with an upright  
340 fluorescence microscope (BX53, Olympus) and a CCD camera (Retiga 2000R, Q Imaging,  
341 BC, Canada), and analyzed with Fiji software (Schindelin et al., 2012).

342

### 343 **Statistics**

344 Data are presented as mean  $\pm$  s.d., and the Wilcoxon rank-sum tests, Spearman's correlation  
345 tests, Pearson's correlation tests, and permutation tests described above were used for

346 statistical comparisons. Pairwise comparisons were two-tailed unless otherwise noted. Error

347 bars in graphs represent the s.e.m. No statistical tests were run to predetermine the sample

348 size, and blinding and randomization were not performed.

349

350

351 **References**

352 Attardo A, Fitzgerald JE, Schnitzer MJ. 2015. Impermanence of dendritic spines in live adult CA1

353 hippocampus. *Nature* **523**: 592–596.

354 Dana H, Mohar B, Sun Y, Narayan S, Gordus A, Hasseman JP, Tsegaye G, Holt GT, Hu A, Walpita D,

355 Patel R, Macklin JJ, Bargmann CI, Ahrens MB, Schreiter ER, Jayaraman V, Looger LL,

356 Svoboda K, Kim DS. 2016. Sensitive red protein calcium indicators for imaging neural

357 activity. *eLife* **5**: 413.

358 Dombeck DA, Harvey CD, Tian L, Looger LL, Tank DW. 2010. Functional imaging of hippocampal

359 place cells at cellular resolution during virtual navigation. *Nature Neuroscience* **13**: 1433–

360 1440.

361 Dombeck DA, Khabbaz AN, Collman F, Adelman TL, Tank DW. 2007. Imaging large-scale neural

362 activity with cellular resolution in awake, mobile mice. *Neuron* **56**: 43–57.

363 Friedman A, Homma D, Gibb LG, Amemori K, Rubin SJ, Hood AS, Riad MH, Graybiel AM. 2015. A

364 Corticostriatal path targeting striosomes controls decision-making under conflict. *Cell* **161**:

365 1320–1333.

366 Harvey CD, Coen P, Tank DW. 2012. Choice-specific sequences in parietal cortex during a

367 virtual-navigation decision task. *Nature* **484**: 62–68.

- 368 Helmchen F, Denk W. 2005. Deep tissue two-photon microscopy. *Nature Methods* **2**: 932–940.
- 369 Hira R, Ohkubo F, Ozawa K, Isomura Y, Kitamura K, Kano M, Kasai H, Matsuzaki M. 2013.
- 370 Spatiotemporal dynamics of functional clusters of neurons in the mouse motor cortex during a
- 371 voluntary movement. *Journal of Neuroscience* **33**: 1377–1390.
- 372 Inoue M, Takeuchi A, Horigane S, Ohkura M, Gengyo-Ando K, Fujii H, Kamijo S, Takemoto-Kimura
- 373 S, Kano M, Nakai J, Kitamura K, Bito H. 2014. Rational design of a high-affinity, fast, red
- 374 calcium indicator R-CaMP2. *Nature Methods* **12**: 64–70.
- 375 Ji N, Milkie DE, Betzig, E. 2010. Adaptive optics via pupil segmentation for high-resolution imaging
- 376 in biological tissues. *Nature Methods* **7**: 141–147.
- 377 Jia H, Rochefort NL, Chen X, Konnerth A. 2010. Dendritic organization of sensory input to cortical
- 378 neurons *in vivo*. *Nature* **464**: 1307–1312.
- 379 Kaneda K, Kasahara H, Matsui R, Katoh T, Mizukami H, Ozawa K, Watanabe D, Isa T. 2011.
- 380 Selective optical control of synaptic transmission in the subcortical visual pathway by
- 381 activation of viral vector-expressed halorhodopsin. *PLoS One* **6**: e18452.
- 382 Kawakami R, Sawada K, Sato A, Hibi T, Kozawa Y, Sato S, Yokoyama H, Nemoto T. 2013.
- 383 Visualizing hippocampal neurons with *in vivo* two-photon microscopy using a 1030 nm
- 384 picosecond pulse laser. *Scientific Reports* **3**: 1–7.



- 385 Kawakami R, Sawada K, Kusama Y, Fang YC, Kanazawa S, Kozawa Y, Sato S, Yokoyama H,  
386 Nemoto T. 2015. *In vivo* two-photon imaging of mouse hippocampal neurons in dentate gyrus  
387 using a light source based on a high-peak power gain-switched laser diode. *Biomedical Optics*  
388 *Express* **6**: 891–901.
- 389 Kim H, Ährlund-Richter S, Wang X, Deisseroth K, Carlén M. 2016. Prefrontal parvalbumin neurons  
390 in control of attention. *Cell* **164**: 208–218.
- 391 Kim TH, Zhang Y, Lecoq J, Jung JC, Li J, Zeng H, Niell CM, Schnitzer MJ. 2016. Long-term optical  
392 access to an estimated one million neurons in the live mouse cortex. *Cell Reports* **17**: 3385–  
393 3394.
- 394 Kobayashi K, Sano H, Kato S, Kuroda K, Nakamuta S, Isa T, Nambu A, Kaibuchi K, Kobayashi K.  
395 2016. Survival of corticostriatal neurons by Rho/Rho-kinase signaling pathway. *Neuroscience*  
396 *Letters* **630**: 45–52.
- 397 Lecoq J, Savall J, Vučinić D, Grewe BF, Kim H, Li JZ, Kitch LJ, Schnitzer MJ. 2014. Visualizing  
398 mammalian brain area interactions by dual-axis two-photon calcium imaging. *Nature*  
399 *Neuroscience* **17**: 1825–1829.

- 400 Low RJ, Gu Y, Tank DW. 2014. Cellular resolution optical access to brain regions in fissures:  
401 imaging medial prefrontal cortex and grid cells in entorhinal cortex. *Proceedings of the*  
402 *National Academy of Sciences of the United States of America* **111**: 18739–18744.
- 403 Masamizu Y, Tanaka YR, Tanaka YH, Hira R, Ohkubo F, Kitamura K, Isomura Y, Okada T,  
404 Matsuzaki M. 2014. Two distinct layer-specific dynamics of cortical ensembles during  
405 learning of a motor task. *Nature Neuroscience* **17**: 987–994.
- 406 Matsuzaki M, Ellis-Davies GCR, Kasai H. 2008. Three-dimensional mapping of unitary synaptic  
407 connections by two-photon macro photolysis of caged glutamate. *Journal of Neurophysiology*  
408 **99**: 1535–1544.
- 409 Ohkura M, Sasaki T, Kobayashi C, Ikegaya Y, Nakai J. 2012. An improved genetically encoded red  
410 fluorescent Ca<sup>2+</sup> indicator for detecting optically evoked action potentials. *PLoS One* **7**:  
411 e39933.
- 412 Ohki K, Chung S, Ch'ng YH, Kara P, Reid RC. 2005. Functional imaging with cellular resolution  
413 reveals precise micro-architecture in visual cortex. *Nature* **433**: 597–603.
- 414 Pachitariu M, Stringer C, Schröder S, Dipoppa M, Rossi LF, Carandini M, Harris KD. 2016. Suite2p:  
415 beyond 10,000 neurons with standard two-photon microscopy. *bioRxiv*, doi:10.1101/061507.

- 416 Paxinos G and Franklin K. 2007. *The mouse brain in stereotaxic coordinates* (3rd edition, Academic  
417 Press).
- 418 Pilz GA, Carta S, Stäuble A, Ayaz A, Jessberger S, Helmchen F. 2016. Functional imaging of dentate  
419 granule cells in the adult mouse hippocampus. *Journal of Neuroscience* **36**: 7407–7414.
- 420 Pinto L, Dan Y. 2015. Cell-Type-Specific Activity in Prefrontal Cortex during Goal-Directed  
421 Behavior. *Neuron* **87**: 437–450.
- 422 Pnevmatikakis EA, Soudry D, Gao Y, Machado TA, Merel J, Pfau D, Reardon T, Mu Y, Lacefield C,  
423 Yang W, Ahrens M, Bruno R, Jessell TM, Peterka DS, Yuste R, Paninski L. 2016.  
424 Simultaneous denoising, deconvolution, and demixing of calcium imaging data. *Neuron* **89**:  
425 285–299.
- 426 Podgorski K, Ranganathan G. 2016. Brain heating induced by near-infrared lasers during multiphoton  
427 microscopy. *Journal of Neurophysiology* **116**: 1012–1023.
- 428 Sadakane O, Masamizu Y, Watakabe A, Terada S, Ohtsuka M, Takaji M, Mizukami H, Ozawa K,  
429 Kawasaki H, Matsuzaki M, Yamamori T. 2015. Long-term two-photon calcium imaging of  
430 neuronal populations with subcellular resolution in adult non-human primates. *Cell Reports*  
431 **13**: 1989–1999.

- 432 Schindelin J, Arganda-Carreras I, Frise E, Kaynig V, Longair M, Pietzsch T, Preibisch S, Rueden C,  
433 Saalfeld S, Schmid B, Tinevez JY, White DJ, Hartenstein V, Eliceiri K, Tomancak P, Cardona  
434 A. 2012. Fiji: an open-source platform for biological-image analysis. *Nature Methods* **9**: 676–  
435 682.
- 436 Sofroniew NJ, Flickinger D, King J, Svoboda K. 2016. A large field of view two-photon mesoscope  
437 with subcellular resolution for *in vivo* imaging. *eLife* **5**: 413.
- 438 Stirman JN, Smith IT, Kudenov MW, Smith SL. 2016. Wide field-of-view, multi-region, two-photon  
439 imaging of neuronal activity in the mammalian brain. *Nature Biotechnology*. **34**: 865–870.
- 440 Sul JH, Jo S, Lee D, Jung MW. 2011. Role of rodent secondary motor cortex in value-based action  
441 selection. *Nature Neuroscience* **14**: 1202–1208.
- 442 Tischbirek C, Birkner A, Jia H, Sakmann B, Konnerth A. 2015. Deep two-photon brain imaging with  
443 a red-shifted fluorometric Ca<sup>2+</sup> indicator. *Proceedings of the National Academy of Sciences of  
444 the United States of America* **112**: 11377–11382.
- 445 Tsai PS, Mateo C, Field JJ, Schaffer CB, Anderson ME, Kleinfeld D. 2015. Ultra-large field-of-view  
446 two-photon microscopy. *Optics Express* **23**: 13833–15.
- 447

448 **Figure Legends**

449 **Figure 1. | Optical access to intact medial frontal cortex.**

450 (a) Schematic illustration of *in vivo* two-photon imaging of the mFrC. The dotted square  
451 indicates the location where the Z-stack images, as in (b), were acquired. FrC, frontal cortex;  
452 PL, prelimbic area. (b) Representative XZ image of mFrC expressing R-CaMP1.07. Scale bar,  
453 200  $\mu\text{m}$ . (c) Left, top: representative time-averaged XY image of mFrC expressing  
454 R-CaMP1.07 at a depth of 1030  $\mu\text{m}$ . Scale bar, 100  $\mu\text{m}$ . Left, bottom: spatial distribution of  
455 identified neurons. Traces of the calcium transients of the numbered filled circles are shown  
456 on the right. (d) Expression of R-CaMP1.07 (red) and cell nuclei (NeuroTrace 435, cyan)  
457 after imaging of 11 fields at depths of 340–1140  $\mu\text{m}$  for 5 days. The total duration of imaging  
458 was 200 min. There is no apparent abnormality of fluorescence expression in the mFrC. Scale  
459 bar, 1 mm. (e–g) Expressions of GFAP (e), Iba1 (f), and HSP70/72 (g) in contra-lateral (left)  
460 and imaged (right) hemispheres from the same mouse imaged in (d). Only slight glial  
461 activation and heat shock reactivity was observed. Scale bar, 1 mm.

462

463 **Figure 2. | Optical access to hippocampal CA1 region in the intact brain.**

464 (a) Schematic illustration of *in vivo* two-photon imaging of the hippocampal CA1 region. The  
465 dotted square indicates the location where Z-stack images, as in (b), were acquired. (b)

466 Representative XZ image of jRGECO1a-expressing hippocampus and deep cortical layer.  
467 Scale bar, 200  $\mu\text{m}$ . (c) Left, top: representative time-averaged XY image of  
468 jRGECO1a-expressing CA1 pyramidal layer at a depth of 1040  $\mu\text{m}$  from the cortical surface.  
469 Scale bar, 100  $\mu\text{m}$ . Dense distribution of CA1 neurons is apparent when the images are  
470 time-averaged. Left, bottom: spatial distribution of identified neurons. Traces of the calcium  
471 transients of the numbered filled circles are shown on the right. (d) Expression of jRGECO1a  
472 and cell nuclei after 40 min (in total) imaging of the hippocampal CA1 region for 2 days.  
473 Scale bar, 1 mm. (e) Expressions of GFAP (left), Iba1 (middle), or HSP70/72 (right) in the  
474 contra-lateral and imaged hemispheres from the same mouse imaged in (d). Scale bar, 1 mm.  
475  
476 **Figure 3. | Neural activity in the medial frontal cortex during conditioning.**  
477 (a) Representative traces of licking behavior at conditioning sessions 1 (top) and 4 (bottom)  
478 from the same mouse. Dashed-vertical lines indicate timings of water delivery. (b) Mean  
479 traces of lick frequency at sessions 1 (red) and 4 (blue;  $n = 11$  mice). Light shading indicates  
480 the s.e.m. (c) Time course of responsive rate (rate of those deliveries with licking occurring  
481 within 2 s after the delivery;  $n = 11$  at sessions 1–4 and  $n = 5$  at session 5 before imaging  
482 started). (d) Time course of reaction time (time from the water delivery to the first lick). (e)  
483 Normalized trial-averaged activity of each neuron aligned with the water delivery (dashed

484 lines) and ordered by the time of peak activity. Top, middle, and bottom panels are the  
485 superficial (12 fields from 7 mice), middle (35 fields from 10 mice), and deep (15 fields from  
486 7 mice) areas respectively. (f) Polar histograms of the time of peak activity from reward  
487 delivery (red line). The time bin is 0.5 s, and they are ordered clockwise from the top (-10 s  
488 to 10 s). (g) Normalized trial-averaged shuffled activity of each neuron. The shuffled activity  
489 was calculated by circular shifts of the original calcium traces in each trial. (h) Distribution  
490 and mean of the ridge-to-background ratios in original and shuffled datasets. Top to bottom  
491 rows correspond to the superficial ( $P = 4.81 \times 10^{-101}$ ,  $n = 966$  neurons, Wilcoxon rank-sum  
492 test), middle ( $P = 4.34 \times 10^{-248}$ ,  $n = 2612$  neurons), and deep areas ( $P = 2.04 \times 10^{-146}$ ,  $n = 983$   
493 neurons). \*\*\*:  $P < 0.001$ .

494

495 **Figure 4. | Neural activity in the hippocampal CA1 region during conditioning.**

496 (a) Normalized trial-averaged activity of each neuron aligned with the water delivery (dashed  
497 lines) and ordered by the time of peak activity. (b) Left, Normalized trial-averaged shuffled  
498 activity of each neuron aligned with the water delivery timing and ordered by the time of  
499 peak activity. Right, Distribution and mean of the ridge-to-background ratio in the original  
500 and shuffled datasets. \*\*\*:  $P = 0.000033$ ,  $n = 133$  neurons, Wilcoxon rank-sum test. (c) Polar  
501 histogram of the time of peak activity from reward delivery in each cell in the pooled data.

502 (d) Distribution and mean of the ridge-to-background ratio of neurons with peak activity  
503 during the pre-reward period in original and shuffled datasets.  $P = 0.28$ ,  $n = 31$  neurons,  
504 Wilcoxon rank-sum test. (e) Histograms of the correlation coefficients of the time of peak  
505 activity between the two randomly divided groups of trials in neurons with peak activity  
506 during the pre-reward period.

507

508

509 **Video 1. | Representative two-photon XYZ images of the mFrC expressing**  
510 **R-CaMP1.07.**

511 The depth increment in the image stack was  $2.0 \mu\text{m}$ , and the bottom depth of the imaging was  
512  $1100 \mu\text{m}$ . The field of view was  $512 \times 512$  pixels with a size of  $509.18 \mu\text{m} \times 509.18 \mu\text{m}$ .  
513 Each image was the average of 16 frames. The mouse was not anesthetized. The motion  
514 correction was not conducted. The movie was denoised with a spatial Gaussian filter ( $\sigma =$   
515  $0.6$ ). The right image corresponds to XZ plane of the XYZ images (max intensity-projection  
516 toward Y dimension) and the horizontal yellow line indicates the current depth of the left XY  
517 image.

518

519 **Video 2. | Representative two-photon XYZ images of the neocortex and hippocampus**  
520 **that expressed jRGECO1a.**



521 The depth increment in the image stack was 2.5  $\mu\text{m}$ , and the bottom depth of the imaging was  
522 1100  $\mu\text{m}$ . The field of view was the same size as in Video 1. Each image was the average of  
523 16 frames. The mouse was not anesthetized. The motion correction was not conducted. The  
524 movie was denoised with a spatial Gaussian filter ( $\sigma = 0.6$ ). The right image corresponds to  
525 XZ plane of the XYZ images (max intensity-projection toward Y dimension) and the  
526 horizontal yellow line indicates the current depth of the left XY image. Some leakage of the  
527 virus from the hippocampus to the neocortex during the injection procedure may cause a  
528 subset of the neocortical neurons to express jRGECO1a.

529

530 **Video 3. | Functional imaging of the PL area expressing R-CaMP1.07 during**  
531 **conditioning.**

532 The imaging depth was 1100  $\mu\text{m}$  from the cortical surface. The field of view was 509.18  $\mu\text{m}$   
533  $\times$  509.18  $\mu\text{m}$  and 512  $\times$  512 pixels. White circles at the right bottom indicate the timing of  
534 water delivery, with an inter-delivery interval of 20 s. The data were acquired at 30 Hz, and  
535 the movie was downsampled to 5 Hz and denoised with a spatio-temporal Gaussian filter  
536 (spatial  $\sigma = 0.6$ , temporal  $\sigma = 0.8$ ).

537

538 **Video 4. | Functional imaging of the hippocampal CA1 pyramidal layer that expressed**  
539 **jRGECO1a during conditioning.**

540 The imaging depth was 1000  $\mu\text{m}$  from the cortical surface, and the upper cortical tissue was  
541 intact. The field of view was 509.18  $\mu\text{m} \times 159.04 \mu\text{m}$  and 512  $\times$  160 pixels. White circles at  
542 the right bottom indicate the timing of water delivery, with an inter-delivery interval of 20 s.  
543 The data were acquired at 30 Hz (three frame-averaged), and the movie was downsampled to  
544 5 Hz and denoised with a spatio-temporal Gaussian filter (spatial  $\sigma = 0.6$ , temporal  $\sigma = 0.8$ ).

545

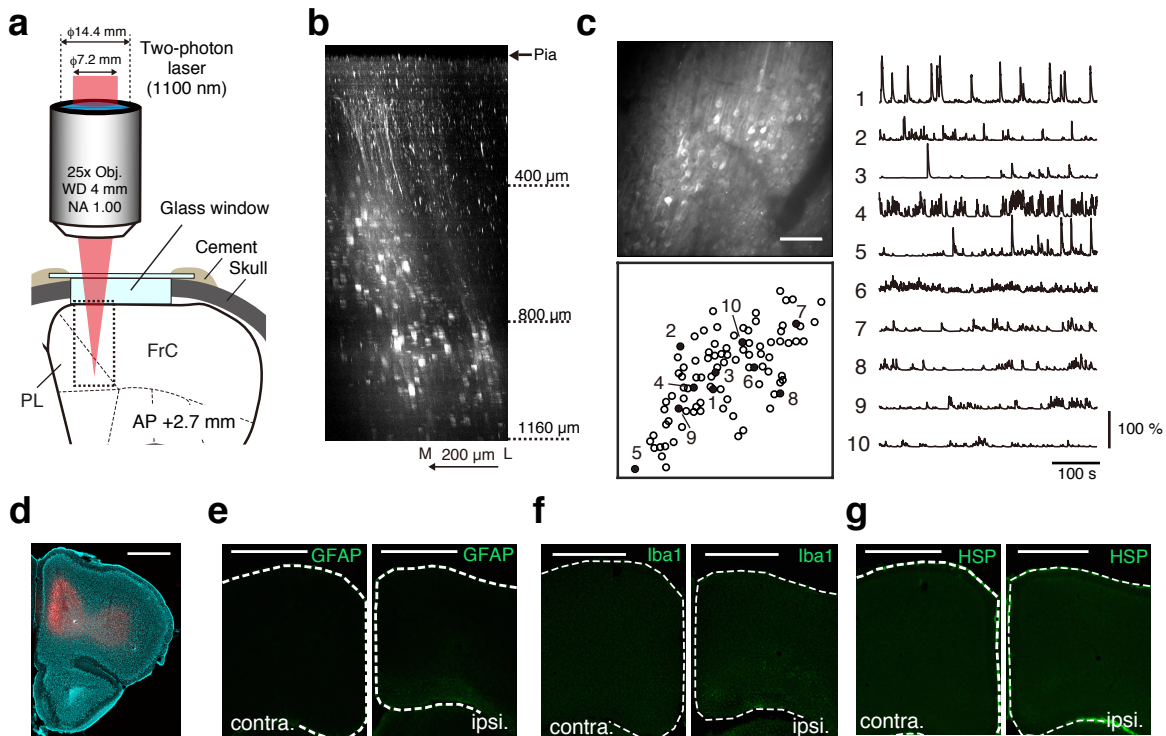

Figure 1. Kondo et al.

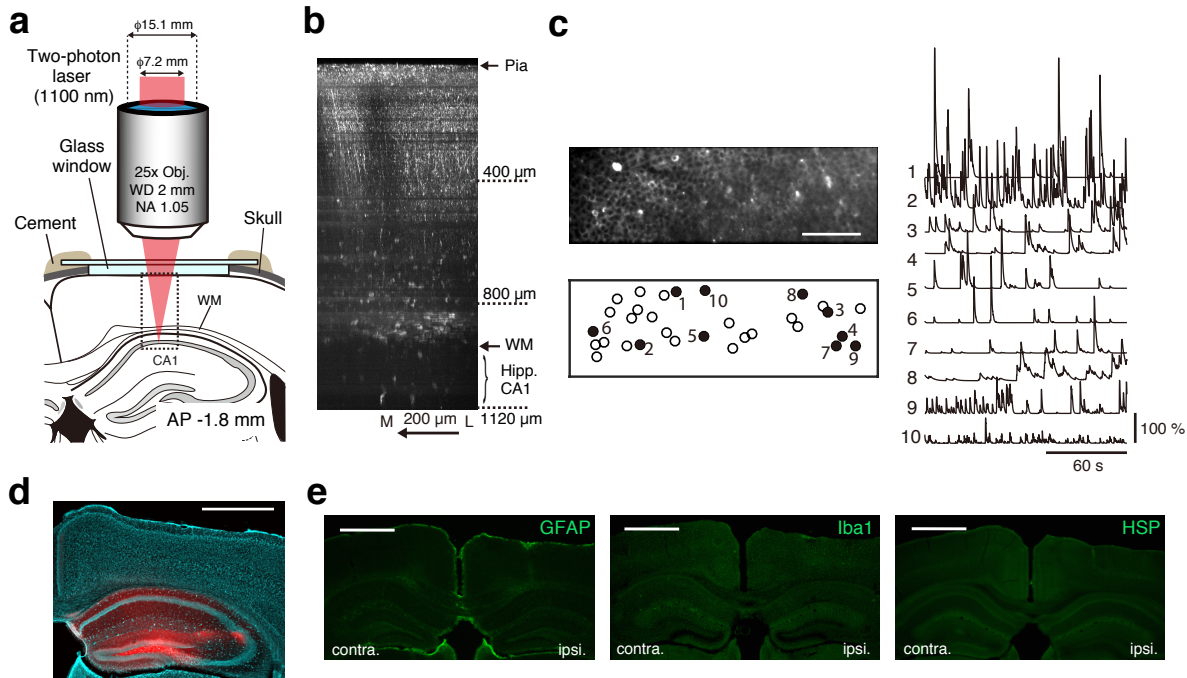

Figure 2. Kondo et al.

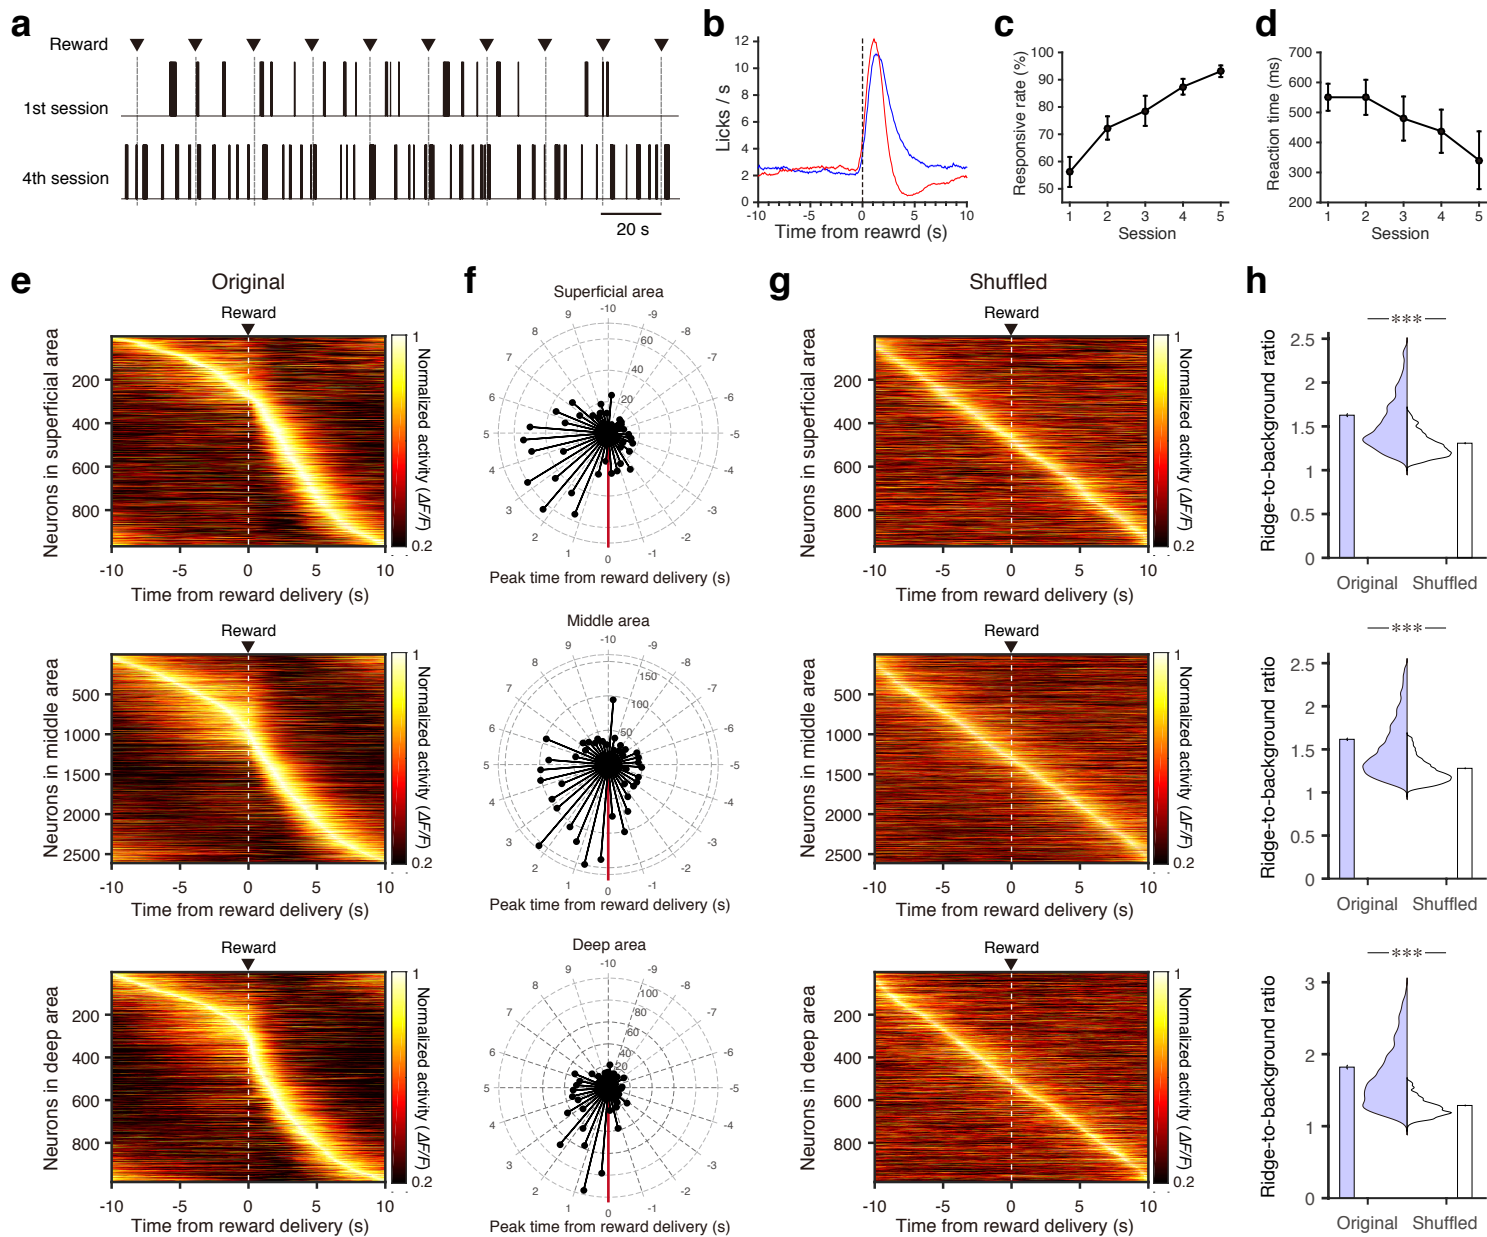

Figure 3. Kondo et al.

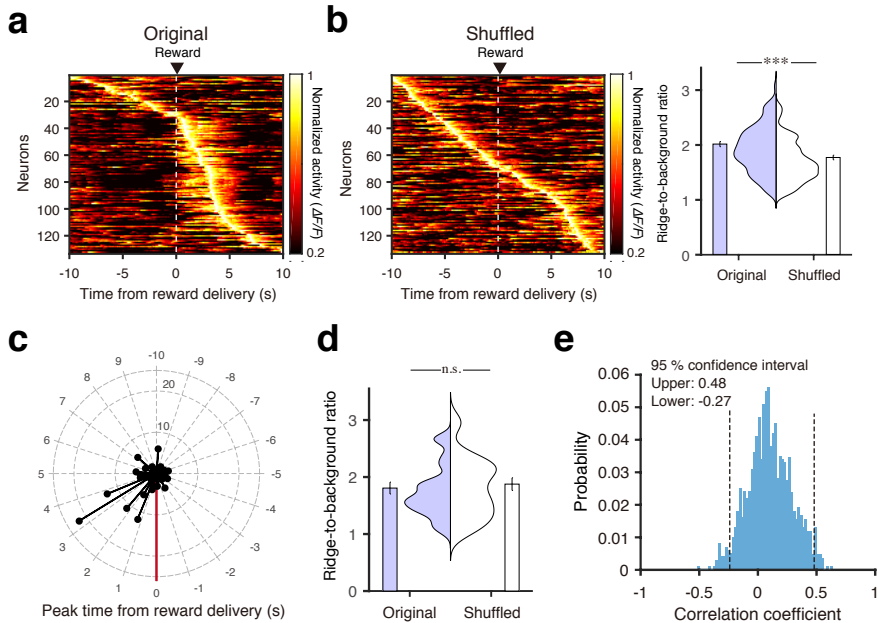

Figure 4. Kondo et al.

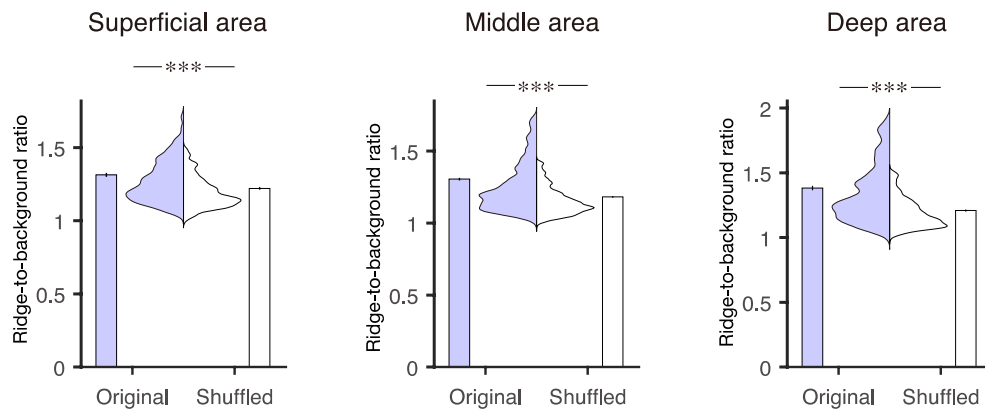

Figure 3–Figure supplement 1. Kondo et al.

**Figure 3–Figure supplement 1. | Ridge-to-background ratios of the mFrC neurons showing peak activity during the pre-reward period.**

Distribution and mean of the ridge-to-background ratios in original and shuffled datasets

from neurons with peak activity during the pre-reward period. Left to right panels correspond

to the superficial ( $P = 1.99 \times 10^{-8}$ ,  $n = 273$  neurons, Wilcoxon rank-sum test), middle ( $P =$

$4.21 \times 10^{-37}$ ,  $n = 943$  neurons), and deep areas ( $P = 2.37 \times 10^{-17}$ ,  $n = 286$  neurons). \*\*\*:  $P <$

0.001.

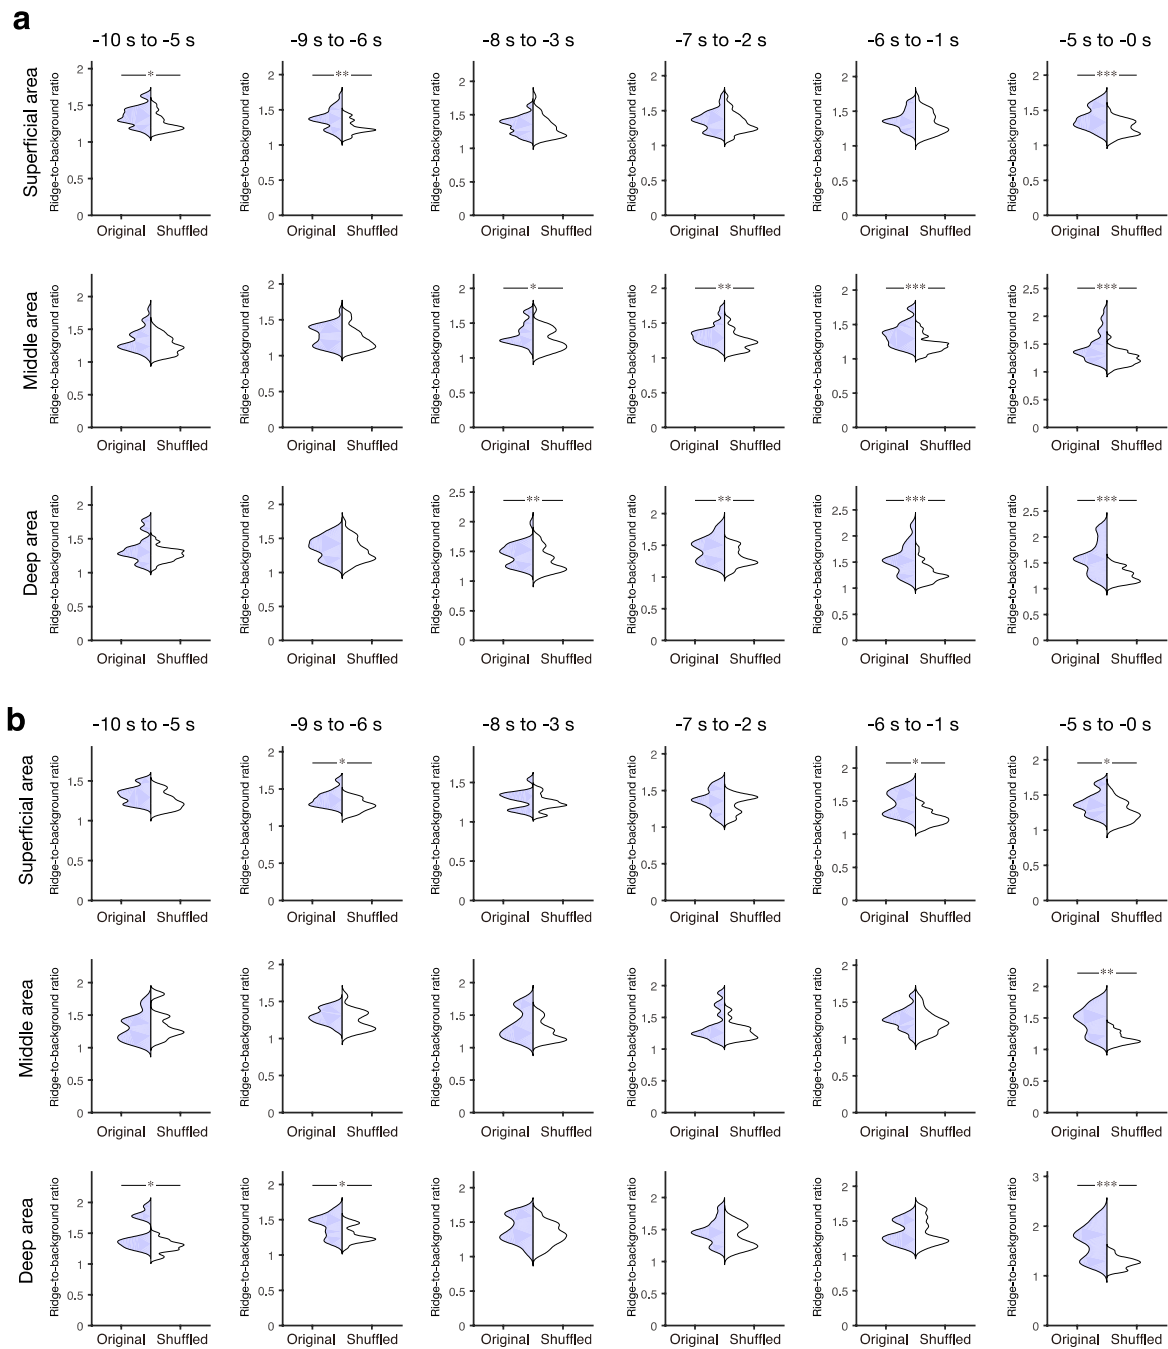

Figure 3–Figure supplement 2. Kondo et al.

**Figure 3–Figure supplement 2. | Ridge-to-background ratios of neurons showing peak activity during 5 s windows in the pre-reward period.**

**(a, b)** Examples of ridge-to-background ratios calculated from neurons with peak mean



activity occurring within six 5 s time windows (from left to right: -10 s to -5 s, -9 s to -4 s, -8 s to -3 s, -7 s to -2 s, -6 s to -1 s, and -5 s to 0 s). Thirty-five (**a**) and fifteen (**b**) neurons were randomly chosen to calculate the ratios. Top, middle, and bottom panels are the superficial, middle, and deep areas of the mFrC, respectively. \*:  $P < 0.05$ , \*\*:  $P < 0.01$ , \*\*\*:  $P < 0.001$ , Wilcoxon rank-sum test.

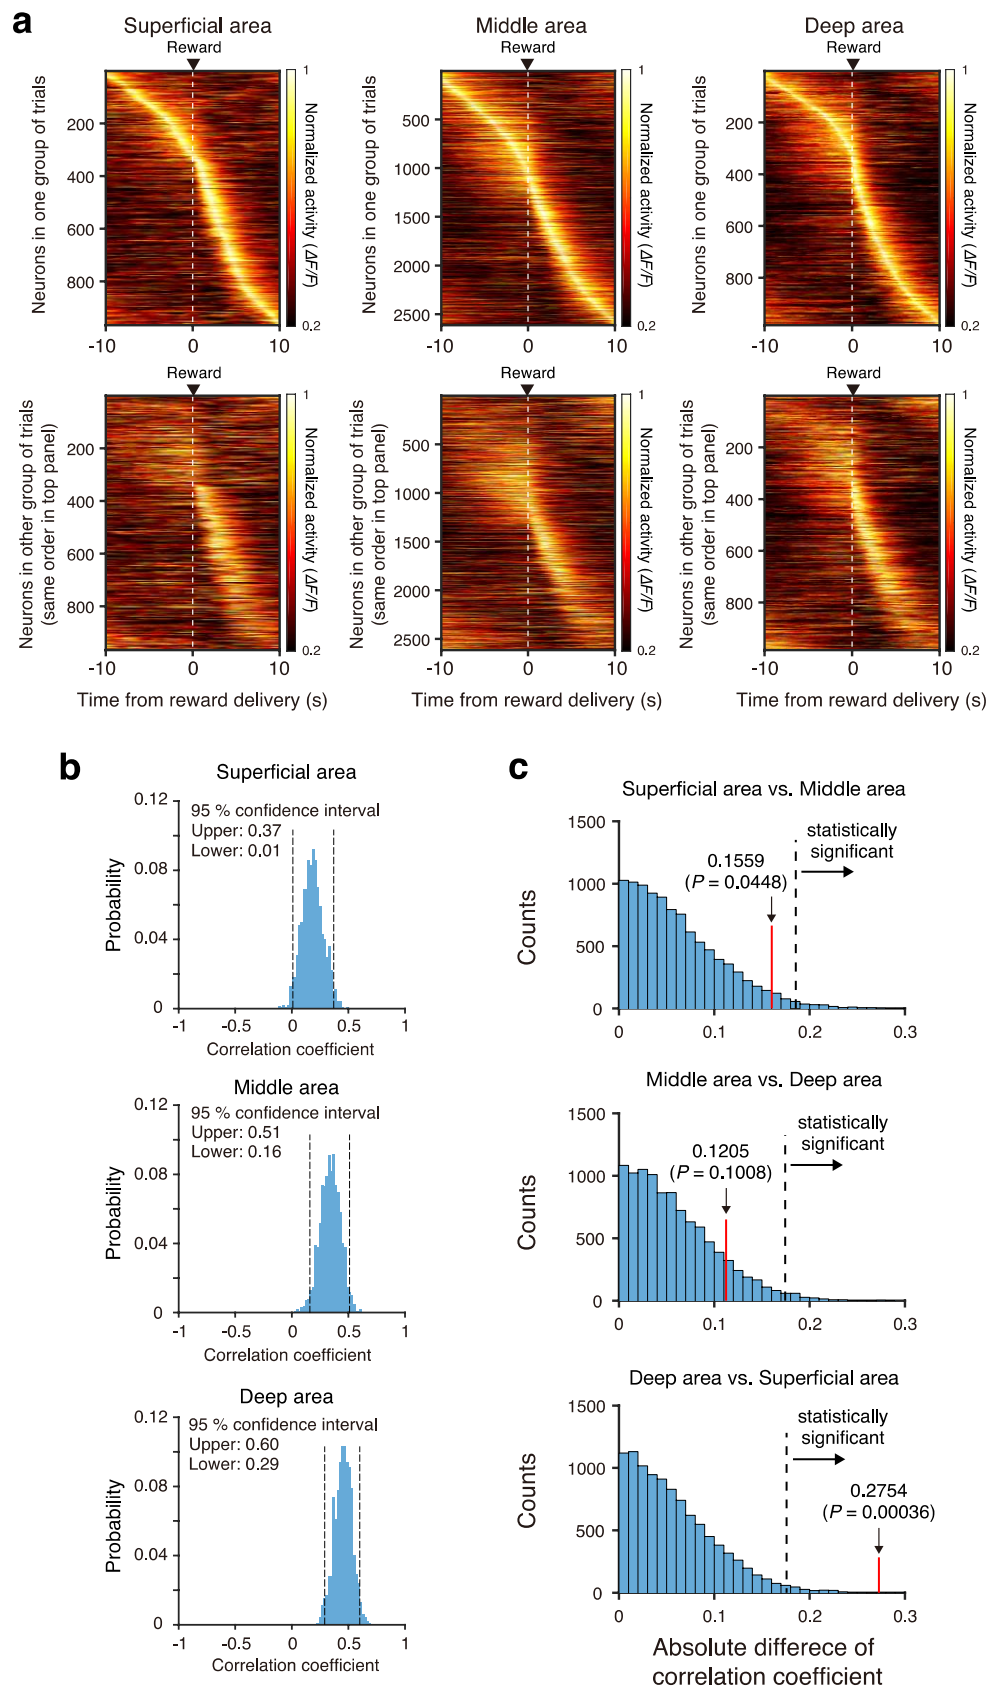

Figure 3—Figure supplement 3. Kondo et al.

**Figure 3–Figure supplement 3. | Stability of trial-by-trial activity of the mFrC neurons with peak activity during the pre-reward period.**

(a) Mean activity of mFrC neurons around the water delivery (dashed lines) from two representative separated groups of trials (top and bottom). In each column, neurons were ordered by the time of peak activity in the top group. A high similarity in the distribution between the top and bottom panels implies that trial-by-trial activity is stable. Left, the superficial area. Middle, the middle area. Right, the deep area. (b) Histograms of correlation coefficients of the time of peak activity between two randomly divided groups of trials, for those neurons with peak activity during the pre-reward period (−10 s to 0 s). The random division of trials was performed 1000 times (see details in Materials and Methods section).

(c) Distribution of the absolute difference of the correlation coefficient between two areas (top, superficial area vs. middle area; middle, middle area vs. deep area; bottom, deep area vs. superficial area) with randomly reassigned neurons with peak activity during the pre-reward period. The difference was estimated by a permutation procedure (see details in Data Analysis section in Materials and Methods). Dashed lines indicate 95th percentile corrected by the Bonferroni method (resulting in a 98.3% position). Red lines indicated the absolute differences of mean correlation coefficients calculated from (b). In the bottom subimage, the

red line is right of the dashed line, indicating that the trial-to-trial stability was statistically higher in the deep area than in the superficial area.

(a) Randomly chosen 35 cells

(%)

| Window \ Area | -10 s to -5 s | -9 s to -4 s | -8 s to -3 s | -7 s to -2 s | -6 s to -1 s | -5 s to 0 s |
|---------------|---------------|--------------|--------------|--------------|--------------|-------------|
| Superficial   | 30.91         | 27.30        | 15.30        | 17.37        | 51.06        | 77.31       |
| Middle        | 38.69         | 43.64        | 45.65        | 57.45        | 75.61        | 88.24       |
| Deep          | 59.74         | 47.66        | 27.64        | 49.66        | 82.95        | 96.99       |

(b) Randomly chosen 15 cells

(%)

| Window \ Area | -10 s to -5 s | -9 s to -4 s | -8 s to -3 s | -7 s to -2 s | -6 s to -1 s | -5 s to 0 s |
|---------------|---------------|--------------|--------------|--------------|--------------|-------------|
| Superficial   | 9.20          | 7.51         | 5.14         | 5.01         | 14.81        | 25.96       |
| Middle        | 11.61         | 12.79        | 13.01        | 17.10        | 26.66        | 37.30       |
| Deep          | 17.26         | 12.94        | 7.44         | 12.96        | 28.54        | 50.20       |

**Figure 3–Table supplement 1. | Statistics of ridge-to-background ratios of neurons**

**showing peak activity during the 5 s windows in the pre-reward period.**

Percentages of ridge-to-background ratios in which original data were significantly different

( $P < 0.05$ , Wilcoxon rank-sum test) from shuffled data. Random chooses of thirty-five (a) and

fifteen (b) neurons to calculate the ratios were repeated 10000 times.
